# Supplementary material for: Nickel-doped δ-MnO2 abundant in oxygen vacancies as a cathode material for aqueous Zn-ion batteries with superior performance
Source: Royal Society of Chemistry journal article supplement (doi:10.1039/d5nr00009b), 2025-01-01
Supplement: d5nr00009b1.pdf [file d5nr00009b1.pdf]

## Supplementary Information for

### Nickel-doped $\delta$ -MnO<sub>2</sub> abundant in oxygen vacancies as cathode for aqueous Zn-ion batteries with superior performance

Shaolin Yang <sup>a, †\*</sup>, Fangfang Li <sup>a, †</sup>, Panpan Fu <sup>a, †</sup>, Cheng Zhen <sup>a</sup>, Jiandong Wu <sup>a</sup>, Hui

Lu <sup>a</sup>, Chunping Hou <sup>a</sup>, Zhilin Sheng <sup>b</sup>

<sup>a</sup> School of Materials Science and Engineering, Ningxia Research Center of Silicon Target and Silicon-Carbon Negative Materials Engineering Technology, North Minzu University, Yinchuan 750021, China

<sup>b</sup> Helanshan Laboratory, Yinchuan 750021, China

† These authors have contributed equally to this work.

\* Corresponding author. E-mail address: [slyang@nun.edu.cn](mailto:slyang@nun.edu.cn) (S. Yang)

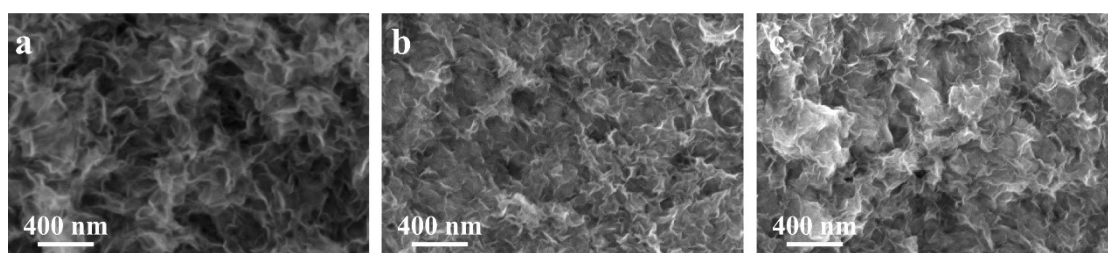

Fig. S1. SEM images of (a) 3%Ni- $\delta$ -MnO<sub>2</sub>, (b) 4%Ni- $\delta$ -MnO<sub>2</sub> and (c) 6%Ni- $\delta$ -MnO<sub>2</sub>.

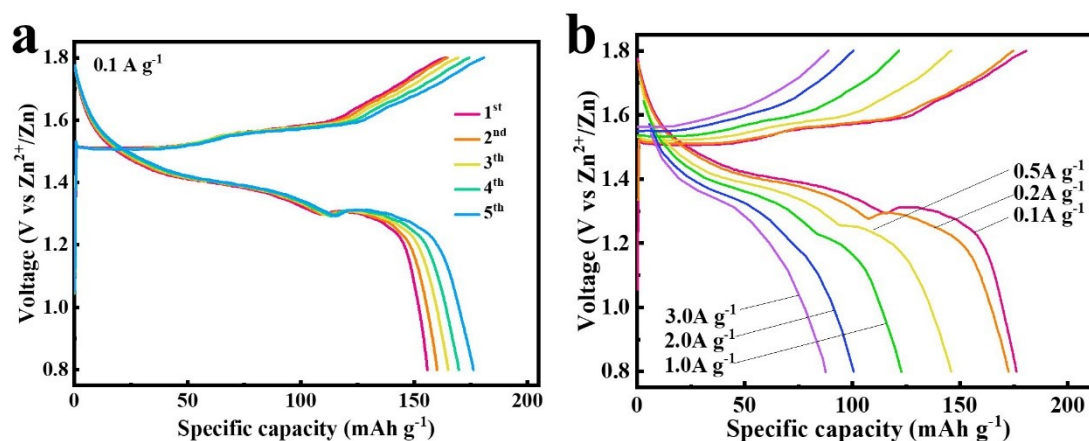

Fig. S2. (a) GCD profiles at 0.1 A g<sup>-1</sup> in the initial five cycles, and (b) GCD profiles of the  $\delta$ -MnO<sub>2</sub> cathode across different current densities.

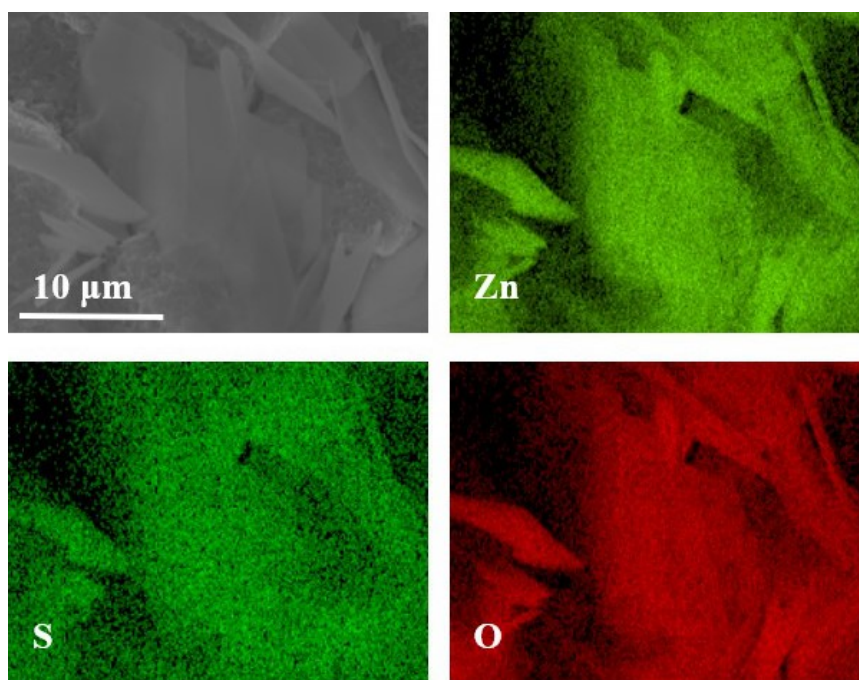

Fig. S3. EDS mapping of the 5%Ni- $\delta$ -MnO<sub>2</sub> cathode when discharged to 0.8 V.

Table S1. SSA, TPV and APD of  $\delta$ -MnO<sub>2</sub> and 5%Ni- $\delta$ -MnO<sub>2</sub>.

| Samples                          | SSA (m <sup>2</sup> g <sup>-1</sup> ) | TPV (cm <sup>3</sup> g <sup>-1</sup> ) | APD (nm) |
|----------------------------------|---------------------------------------|----------------------------------------|----------|
| $\delta$ -MnO <sub>2</sub>       | 24.02                                 | 0.053428                               | 3.5135   |
| 5%Ni- $\delta$ -MnO <sub>2</sub> | 84.28                                 | 0.143309                               | 3.7450   |

Table S2 Summary of the electrochemical performance of various heteroatom-doped manganese-based cathodes in ZIBs.

| Cathode                          | Electrolyte                                            | Voltage window | Specific capacity                                     | Cycling stability                                            | Ref.         |
|----------------------------------|--------------------------------------------------------|----------------|-------------------------------------------------------|--------------------------------------------------------------|--------------|
| 5%Ni- $\delta$ -MnO <sub>2</sub> | 2 M ZnSO <sub>4</sub> +<br>0.25 M<br>MnSO <sub>4</sub> | 0.8-1.8 V      | 401.6 mAh g <sup>-1</sup><br>at 0.1 A g <sup>-1</sup> | 75.5% retention after<br>1000 cycles at 1 A g <sup>-1</sup>  | This<br>work |
| Ce-MnO <sub>2</sub> @CC          | PAM/ZnSO <sub>4</sub> -<br>MnSO <sub>4</sub>           | 0.8-1.8 V      | 311 mAh g <sup>-1</sup><br>at 0.1 A g <sup>-1</sup>   | 65.0% retention after<br>450 cycles at 0.1 A g <sup>-1</sup> | 1            |
| K- $\delta$ -MnO <sub>2</sub>    | 2 M ZnSO <sub>4</sub> +<br>0.1 M MnSO <sub>4</sub>     | 1-1.9 V        | 270.5 mAh g <sup>-1</sup><br>at 0.1 A g <sup>-1</sup> | ~50% retention after<br>1000 cycles at 2 A g <sup>-1</sup>   | 2            |

|                                       |                                                    |           |                                                      |                                                              |   |
|---------------------------------------|----------------------------------------------------|-----------|------------------------------------------------------|--------------------------------------------------------------|---|
| V-doped<br>MnO <sub>2</sub>           | 1 M ZnSO <sub>4</sub>                              | 1-1.8 V   | 266 mAh g <sup>-1</sup><br>at 0.1 A g <sup>-1</sup>  | 49.2% retention after<br>100 cycles at 0.1 A g <sup>-1</sup> | 3 |
| Zn-doped<br>MnO <sub>2</sub>          | 2 M ZnSO <sub>4</sub> +<br>0.2 M MnSO <sub>4</sub> | 1-1.8 V   | ~320 mAh g <sup>-1</sup><br>at 0.1 A g <sup>-1</sup> | 66% retention after<br>100 cycles at 0.2 A g <sup>-1</sup>   | 4 |
| La–Ca co-<br>doped ε-MnO <sub>2</sub> | 2 M ZnSO <sub>4</sub> +<br>0.4 M MnSO <sub>4</sub> | 0.8-1.9 V | 297 mAh g <sup>-1</sup><br>at 0.2 A g <sup>-1</sup>  | 76% retention after<br>100 cycles at 0.2 A g <sup>-1</sup>   | 5 |
| Co-Mn <sub>3</sub> O <sub>4</sub>     | 2 M ZnSO <sub>4</sub> +<br>0.2 M MnSO <sub>4</sub> | 0.2-2.2 V | 220 mAh g <sup>-1</sup><br>at 0.1 A g <sup>-1</sup>  | 72.5% retention after<br>1100 cycles at 2 A g <sup>-1</sup>  | 6 |
| Mo-MnO <sub>2</sub>                   | 2 M ZnSO <sub>4</sub> +<br>0.1 M MnSO <sub>4</sub> | 0.9-1.8 V | 327 mAh g <sup>-1</sup><br>at 0.2 A g <sup>-1</sup>  | 76.8% retention after<br>1000 cycles at 1 A g <sup>-1</sup>  | 7 |

## References

1. Y. Song, J. Li, R. Qiao, X. Dai, W. Jing, J. Song, Y. Chen, S. Guo, J. Sun, Q. Tan and Y. Liu, *Chem. Eng. J.*, 2022, **431**, 133387.
2. Q. Xie, G. Cheng, T. Xue, L. Huang, S. Chen, Y. Sun, M. Sun, H. Wang and L. Yu, *Materials Today Energy*, 2022, **24**.
3. M. H. Alfaruqi, S. Islam, V. Mathew, J. Song, S. Kim, T. Duong Pham, J. Jo, S. Kim, J. P. Baboo, Z. Xiu and J. Kim, *Appl. Surf. Sci.*, 2017, **404**, 435-442.
4. W. Zhao, J. Fee, H. Khanna, S. March, N. Nisly, S. J. B. Rubio, C. Cui, Z. Li and S. L. Suib, *Journal of Materials Chemistry A*, 2022, **10**, 6762-6771.
5. M. Zhang, W. Wu, J. Luo, H. Zhang, J. Liu, X. Liu, Y. Yang and X. Lu, *Journal of Materials Chemistry A*, 2020, **8**, 11642-11648.
6. J. Ji, H. Z. Wan, B. Zhang, C. Wang, Y. Gan, Q. Y. Tan, N. Z. Wang, J. Yao, Z. H. Zheng, P. Liang, J. Zhang, H. B. Wang, L. Tao, Y. Wang, D. L. Chao and H. Wang, *Advanced Energy Materials*, 2021, **11**.
7. Z. Wang, K. Han, Q. Wan, Y. Fang, X. Qu and P. Li, *Acs Applied Materials & Interfaces*, 2023, **15**, 859-869.
